# Supplementary material for: Mitochondrial Genomes of Kinorhyncha: trnM Duplication and New Gene Orders within Animals
Source: PubMed Central journal article supplement (PMC5068742; doi:10.1371/journal.pone.0165072), 2016-10-18
Supplement: pone.0165072.s003.pdf [file pone.0165072.s003.pdf]

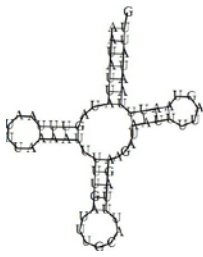

Alanine

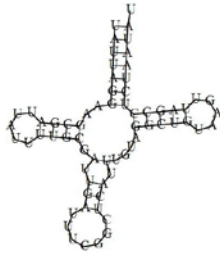

Arginine

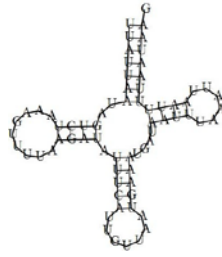

Asparagine

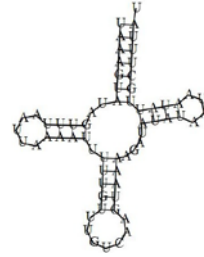

Aspartic Acid

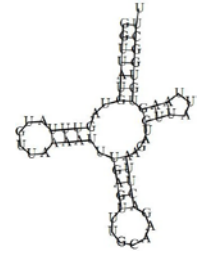

Cysteine

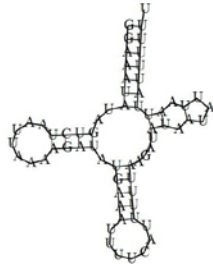

Glutamic Acid

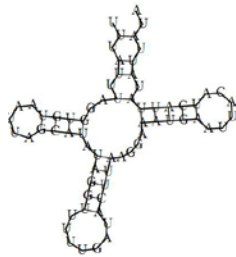

Glutamine

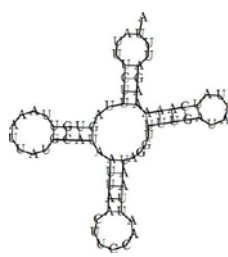

Glycine

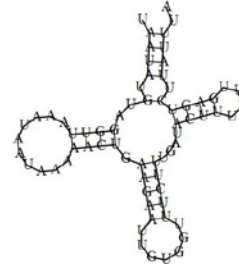

Histidine

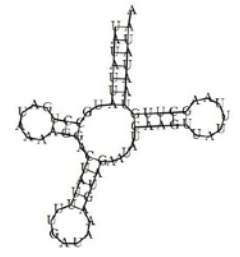

Isoleucine

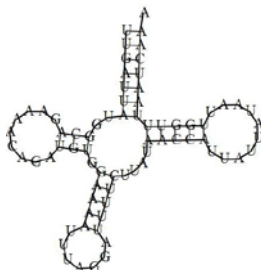

Leucine (UAG)

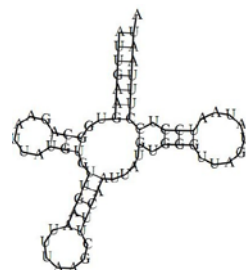

Leucine (UAA)

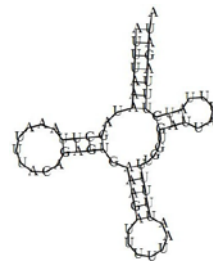

Lysine

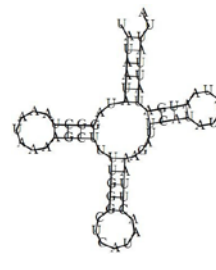

Methionine-1

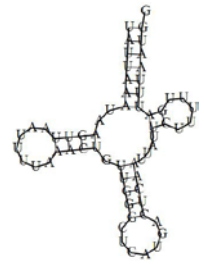

Methionine-2

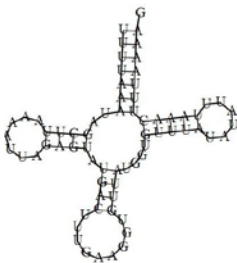

Phenylalanine

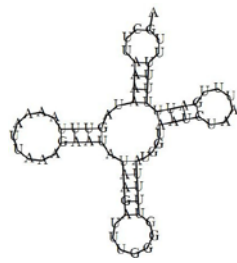

Proline

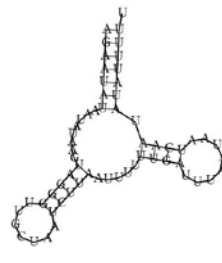

Serine (GCU)

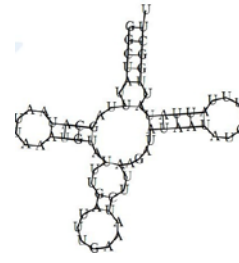

Serine (UGA)

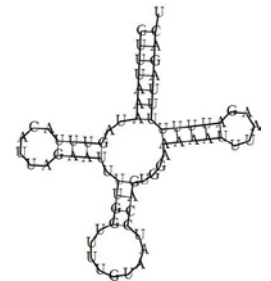

Threonine

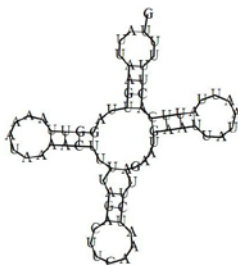

Tryptophan

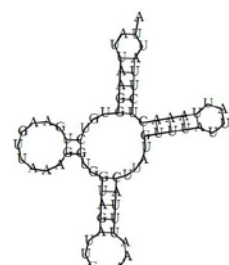

Tyrosine

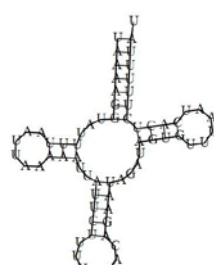

Valine
