# Supplementary material for: Mitochondrial Genomes of Kinorhyncha: trnM Duplication and New Gene Orders within Animals
Source: PubMed Central journal article supplement (PMC5068742; doi:10.1371/journal.pone.0165072), 2016-10-18
Supplement: pone.0165072.s007.pdf [file pone.0165072.s007.pdf]

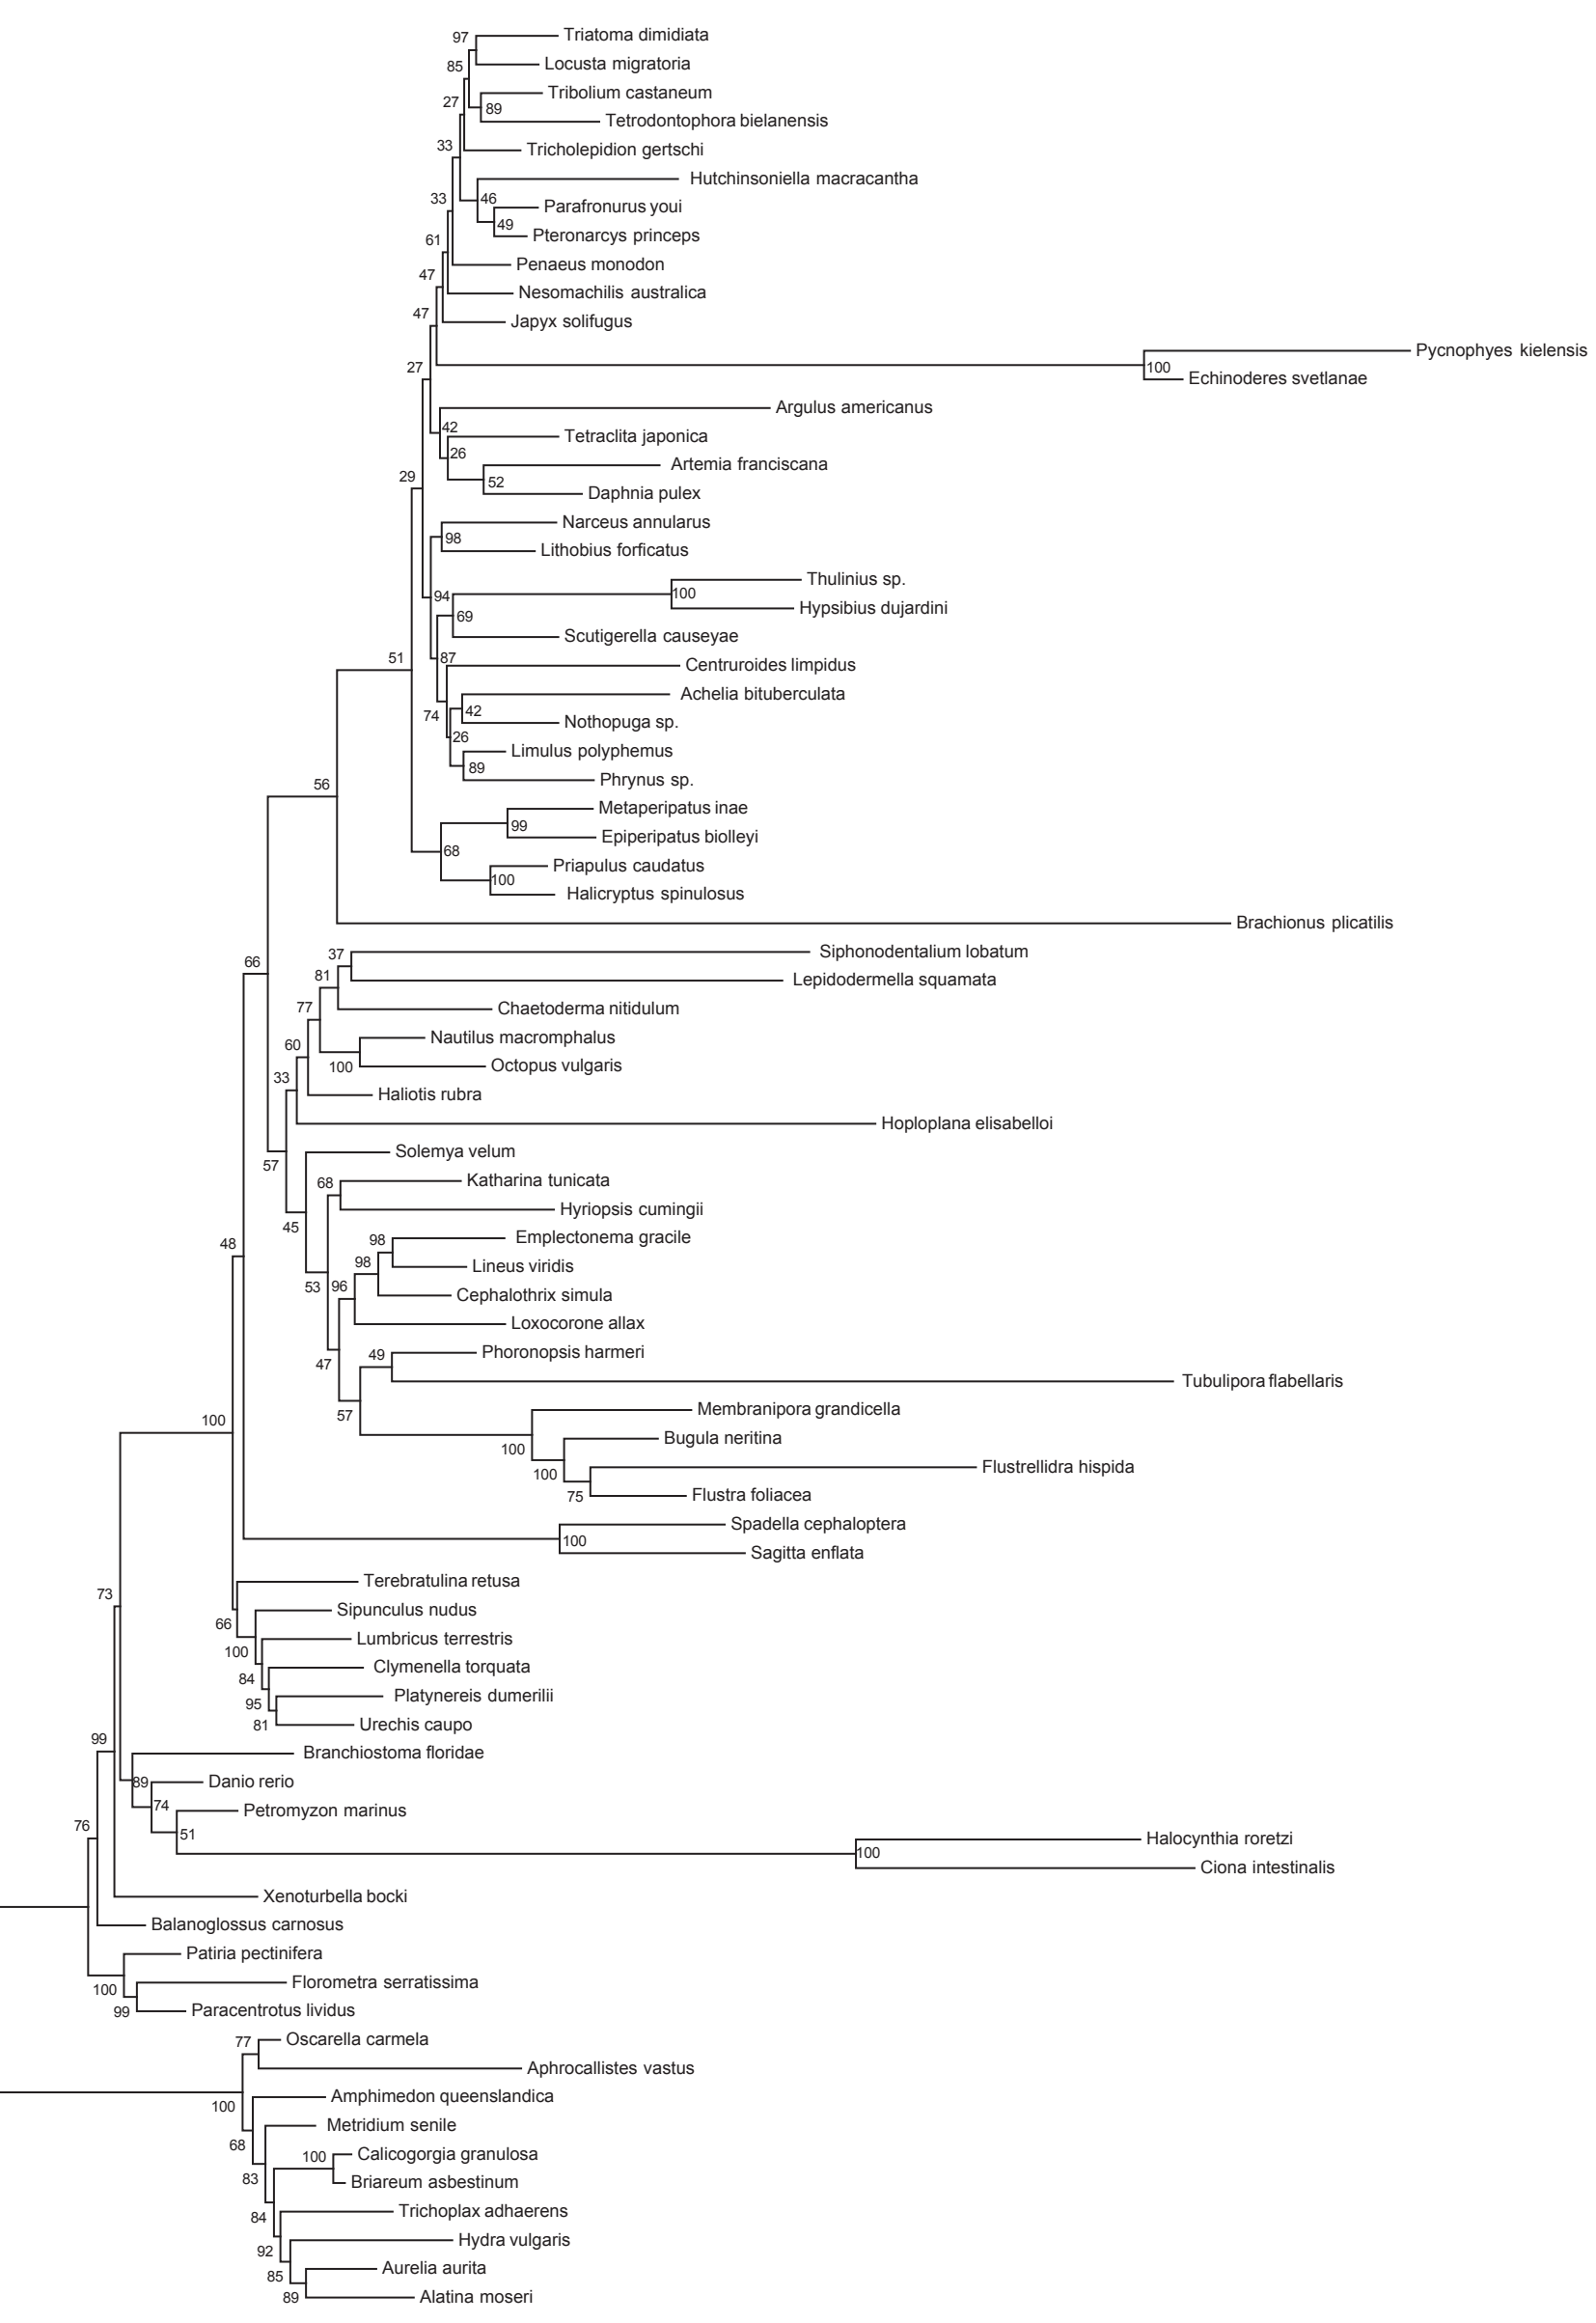

Ecdysozoa

Lophotrochozoa

Lophotrochozoa

Deuterostomia
